# Supplementary material for: Bio-based electrospun polyamide membrane – sustainable multipurpose filter membranes for microplastic filtration
Source: Royal Society of Chemistry journal article supplement (doi:10.1039/d3lp00201b), 2024-01-01
Supplement: d3lp00201b1.pdf [file d3lp00201b1.pdf]

## Electronic Supplementary Information

### **Bio-based electrospun polyamide membrane – sustainable multipurpose filter membranes for microplastic filtration**

*Maximilian Rist and Andreas Greiner\**

M. Rist, A. Greiner

University of Bayreuth, Macromolecular Chemistry and Bavarian Polymer Institute,  
Universitätsstrasse 30, 95440 Bayreuth, Germany.

E-mail: greiner@uni-bayreuth.de

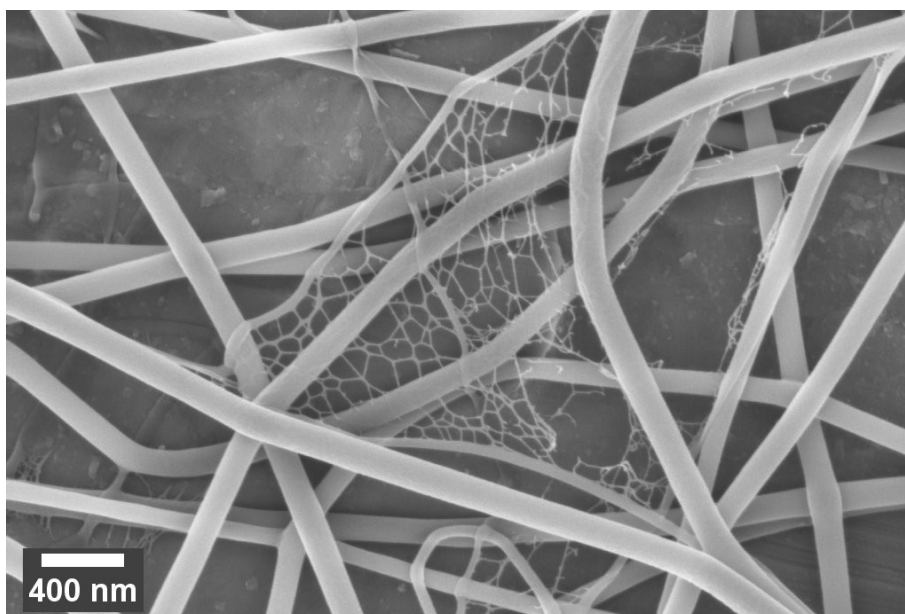

**Figure S1.** SEM image of spider web-like structure found in PA 6.9 membrane prepared from 10 wt% solution in FA/ $\text{CHCl}_3$ .

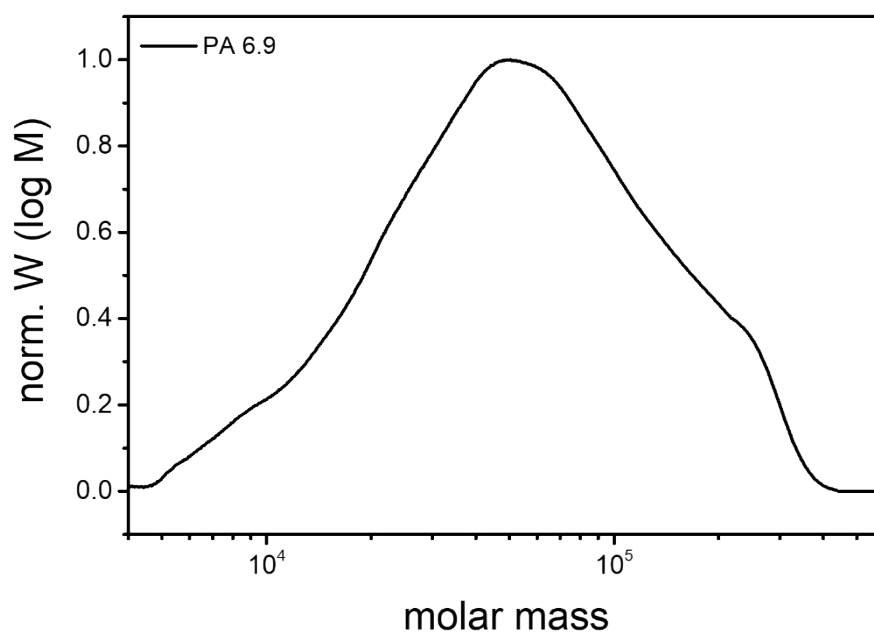

**Figure S2.** Normalized molecular weight distribution of PA 6.9 measured by SEC.

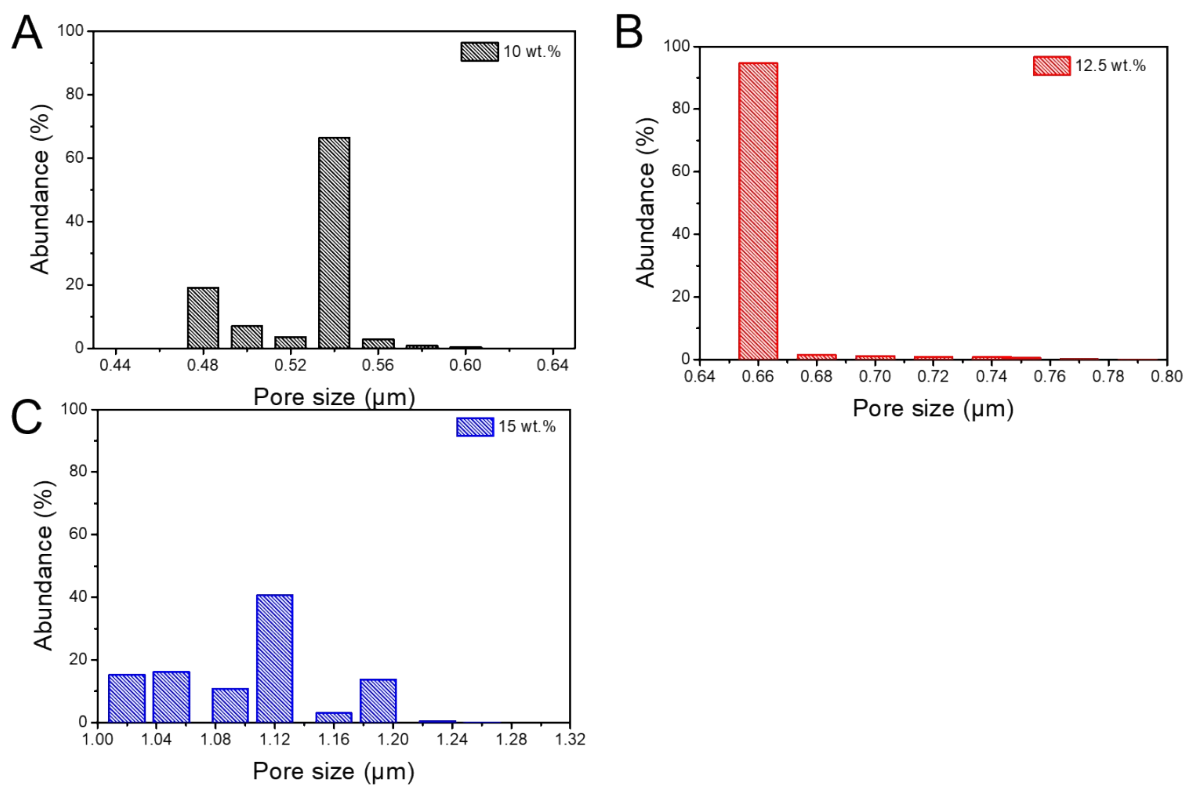

**Figure S3.** Pore size distribution of the nonwovens measured by capillary flow porometry.

**Table S1.** Average weight and resulting density determined by gravimetrically weighing the tensile test specimens (30 × 5 mm) prior to being measured. At least 5 samples were measured and the statistical average is given.

| Material        | Thickness [μm] | Average weight [mg] | Average density [kg m <sup>-3</sup> ] | Basis weight [g m <sup>-2</sup> ] | Porosity <sup>a</sup> [%] |
|-----------------|----------------|---------------------|---------------------------------------|-----------------------------------|---------------------------|
| PA 6.9_10 wt%   | 54±4           | 0.97±0.06           | 119±10                                | 6.4±0.4                           | 89                        |
| PA 6.9_12.5 wt% | 62±2           | 1.46±0.06           | 157±5                                 | 9.7±0.4                           | 85                        |
| PA 6.9_15 wt%   | 60±3           | 1.01±0.09           | 112±7                                 | 6.8±0.6                           | 90                        |

<sup>a</sup> Calculated from the density of bulk PA 6.9 (1080 kg m<sup>-3</sup>) and the average density of the membrane.

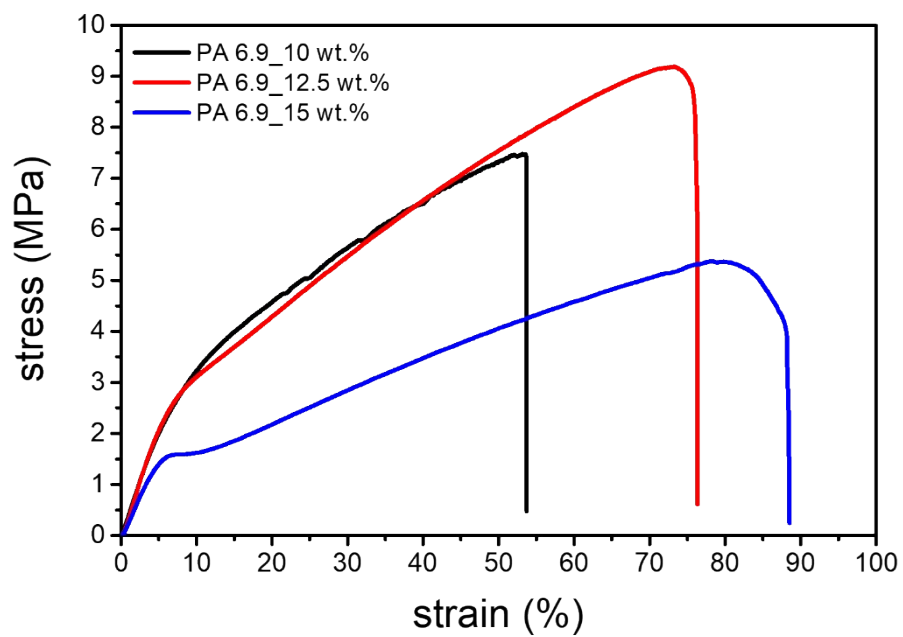

**Figure S4.** Stress-strain curves of the electrospun membranes prepared from PA 6.9.

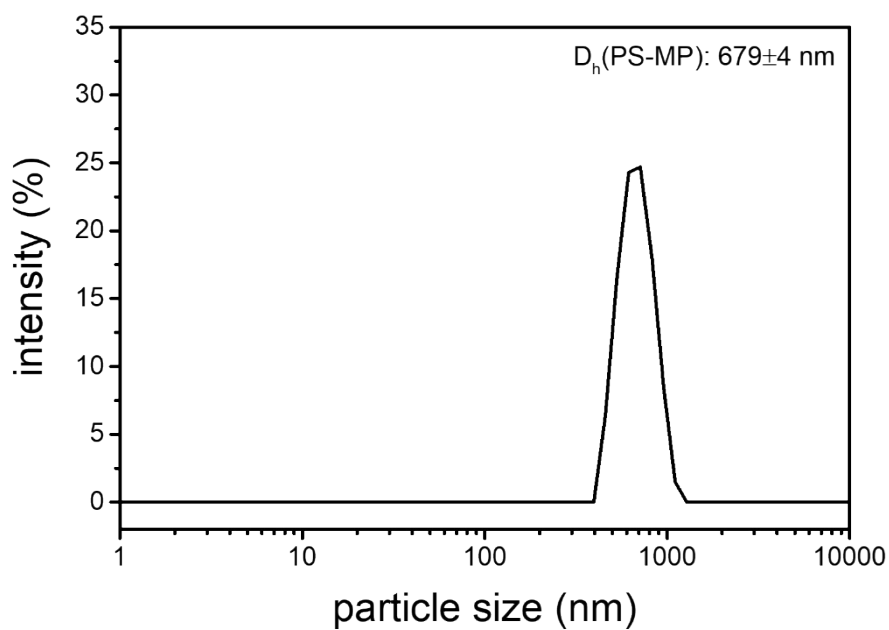

**Figure S5.** DLS measurement of the prepared PS microparticle dispersion in water.

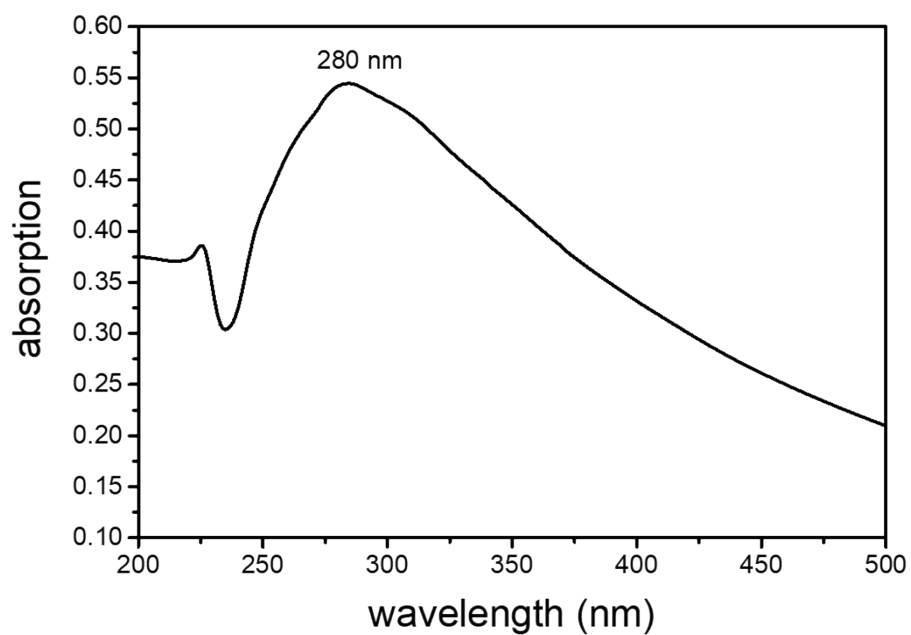

**Figure S6.** Absorption spectrum of the prepared PS microparticle dispersion in water.

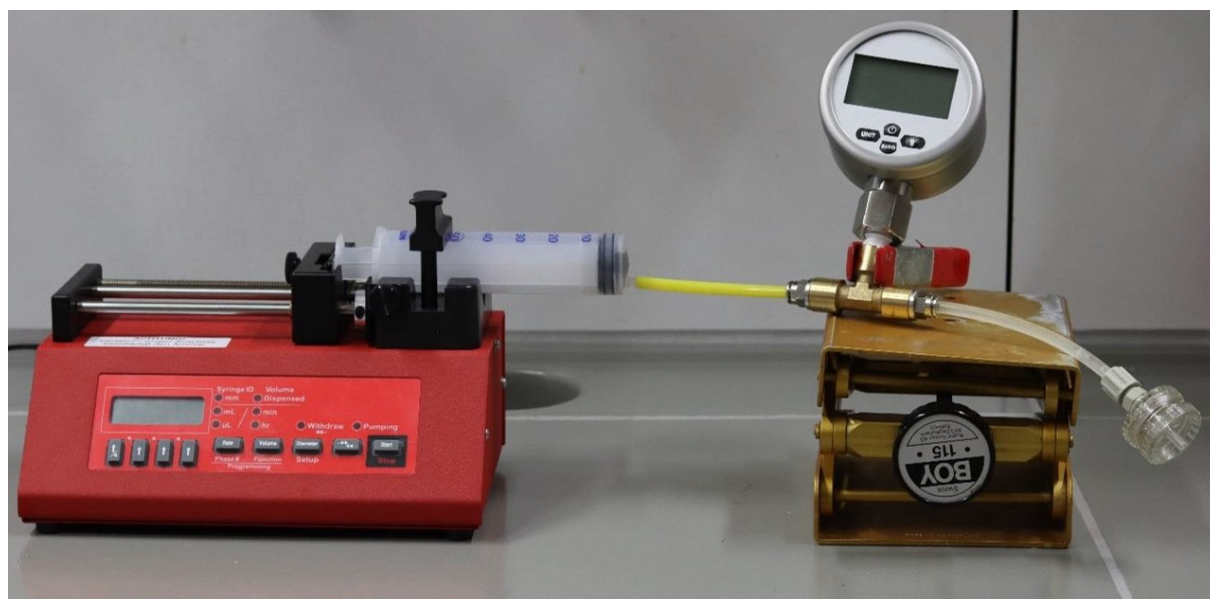

**Figure S7.** Measurement setup for the aqueous filtration of PS microparticles from water with parallel measurement of the pressure drop.

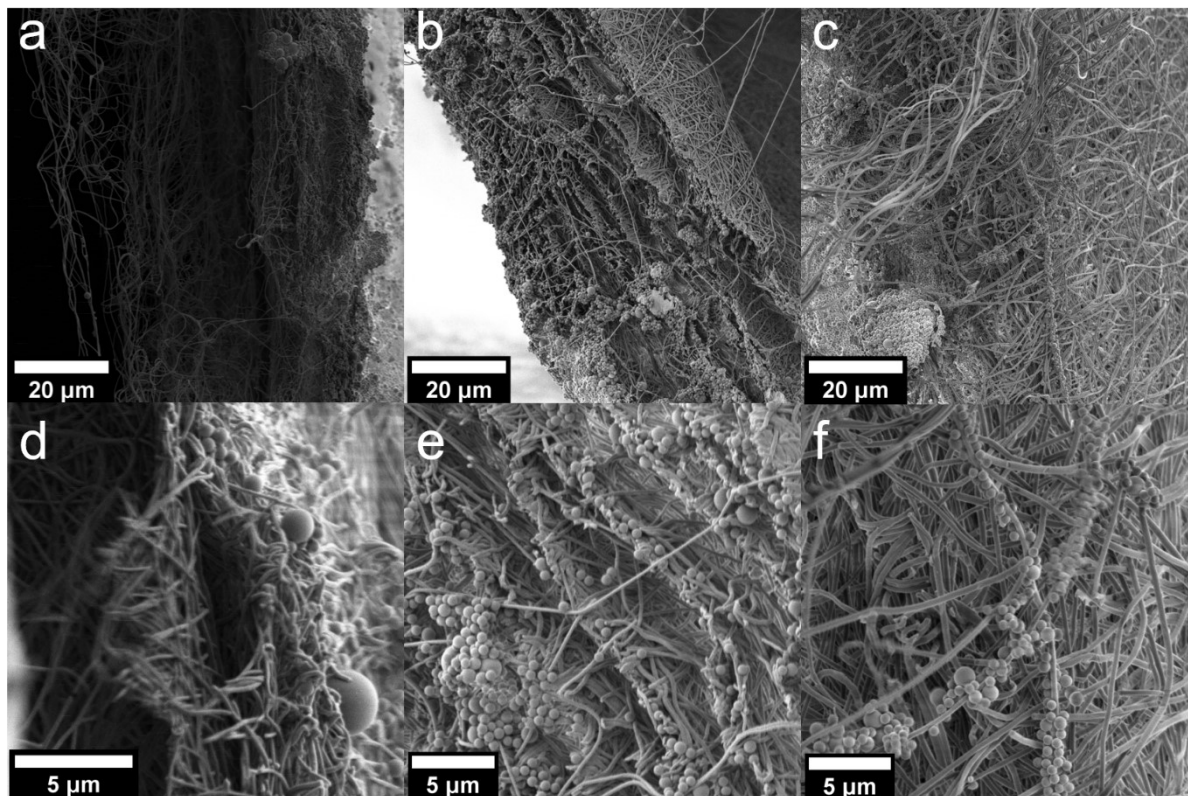

**Figure S8.** SEM pictures of the cross section of the electrospun filter membranes prepared from PA 6.9 solutions in formic acid chloroform 1:1 v/v a & d) 10 wt%, b & e) 12.5 wt% and c & f) 15 wt%.
